# Supplementary material for: Velocity Gradient Separation Reveals a New Extracellular Vesicle Population Enriched in miR-155 and Mitochondrial DNA
Source: Pathogens. 2021 Apr 27;10(5):526. doi: 10.3390/pathogens10050526 (PMC8146806; doi:10.3390/pathogens10050526)
Supplement: Supplementary file 1 [file pathogens-10-00526-s001.zip › pathogens-1152550-supplementary.pdf]

Supplementary FIGURES

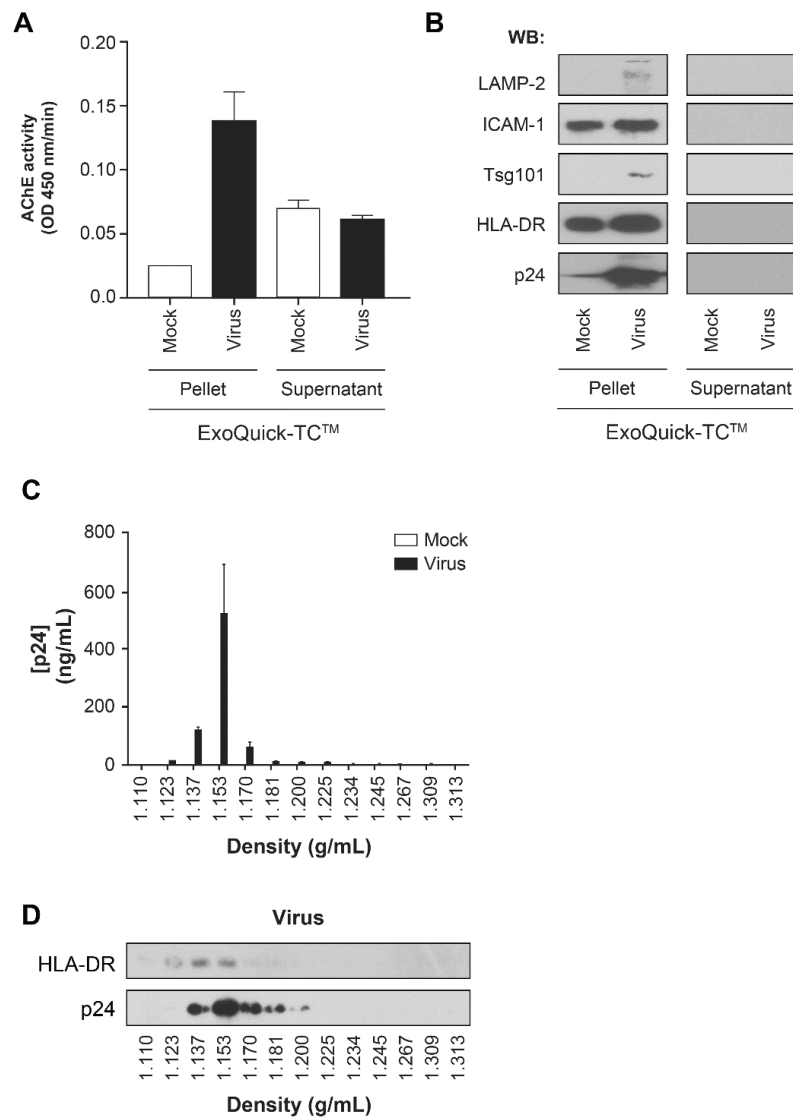

**Figure S1: ExoQuick-TC™ and sucrose gradient appears not to separate EVs from the virus.** Raji-CD4 DCIR cells were cultured with NL4-3 virus or mock for five days. Microfiltered supernatant was centrifuged at 100,000 x g for 45 min. The pellet was re-suspended in PBS before precipitation with ExoQuick-TC™ according to the supplier's instructions (**A**, **B**). The presence of EVs, host and viral proteins were assessed by AChE activity (**A**) and western blots (**B**). 100,000 x g pellet containing EVs and virus or mock was recovered from Raji-CD4 infected-cells and was laid on a sucrose gradient (**C**, **D**). Virions were quantified by p24 ELISA (**C**) and the presence of EVs, host and viral proteins were assessed by western blots (**D**).

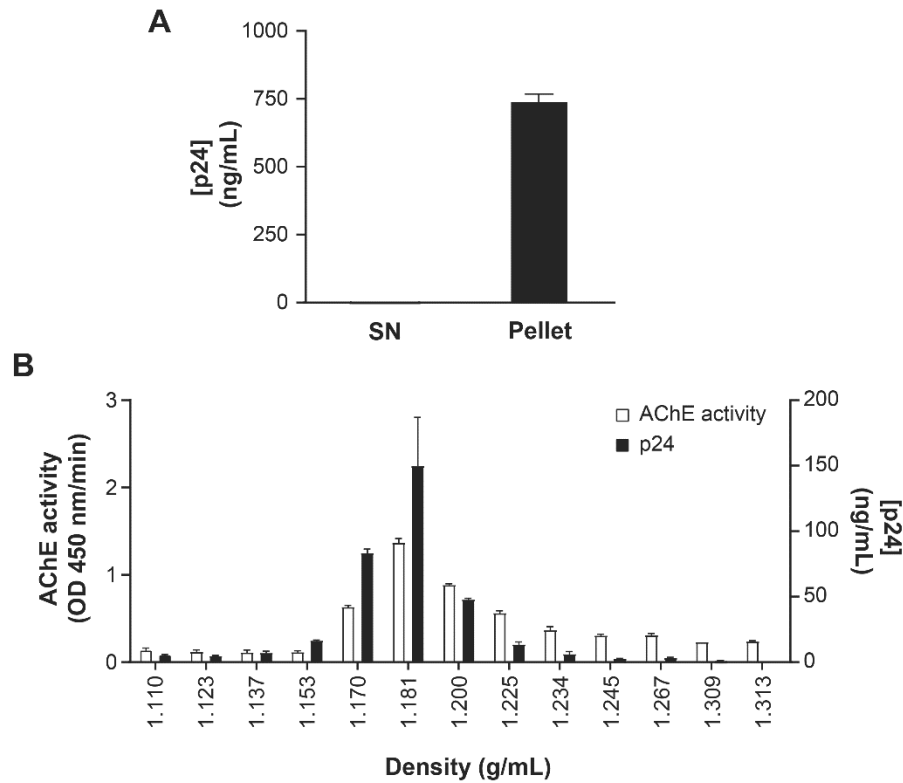

**Figure S2: Quantification of HIV protein p24 in EVs precipitated using a commercial kit.** A pool from five plasma samples from HIV-1 negative individuals were spiked with virions or mock from Raji-CD4 infected-cells. EVs were then precipitated using ExoQuick™, and (A) the associated p24 concentration was determined by ELISA in the ExoQuick pellet as well as in the supernatant (SN). ExoQuick™ precipitate was centrifuged on a sucrose density gradient before p24 concentration and AChE activity were quantified (B).

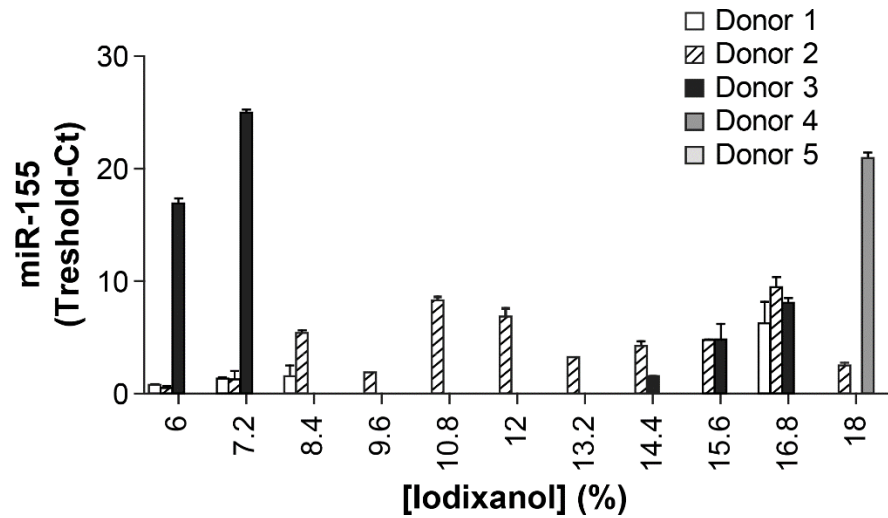

**Figure S3: Variability of miR-155 distribution in iodixanol velocity gradient fractions of plasma obtained from five HIV-1 negative individuals.** Plasmas (n=5) were processed with ExoQuick™ according to the manufacturer's instructions. EVs precipitate was resolved on the iodixanol gradient, and RNA was extracted from each fraction using Trizol. MicroRNA-155 was amplified by RT-PCR. These results show the variability of miR-155 expression in EVs classes among HIV-1 negative individuals.

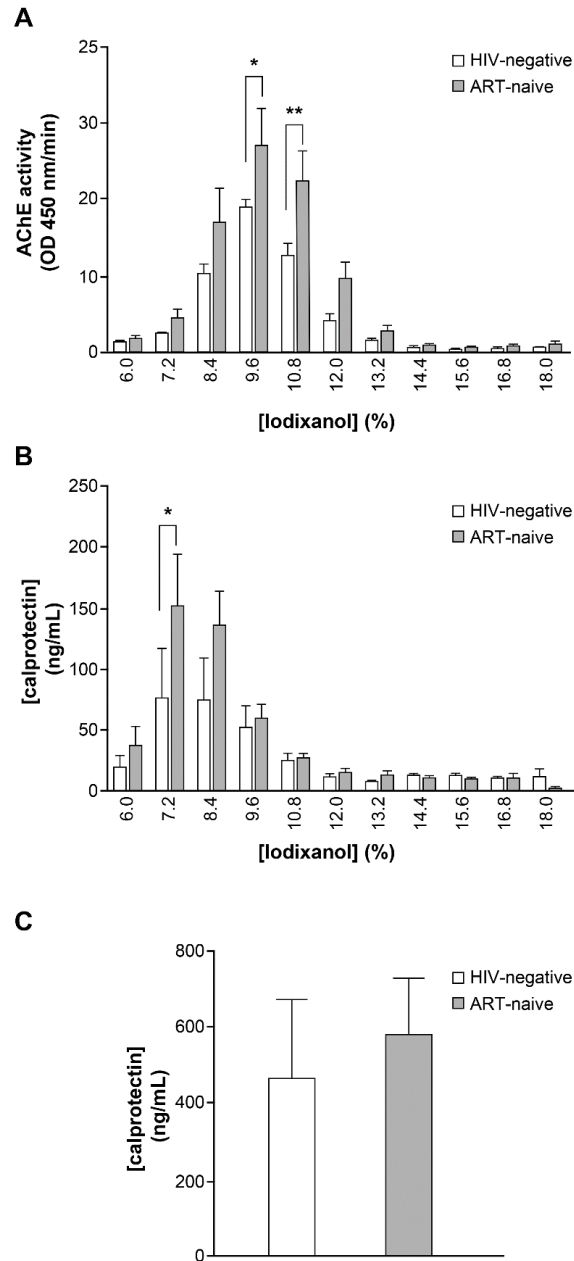

**Figure S4: Separation of plasma calprotectin and AChE EVs by iodixanol velocity gradient.** The plasma pools from HIV-1 negative individuals (n=3) and ART-naïve patients (n=3) were precipitated by ExoQuick™ and overlaid on iodixanol velocity gradient. The relative abundance of AChE-positive EVs (A) and calprotectin (B) in the gradient fractions were measured respectively by enzymatic activity and ELISA. The total amount of precipitated calprotectin from plasma was evaluated by ELISA (C). Values shown correspond to one representative experiment of the pool of three donors and are expressed as mean  $\pm$  SD of technical replicate (\* p < 0.05, \*\* p < 0.01).

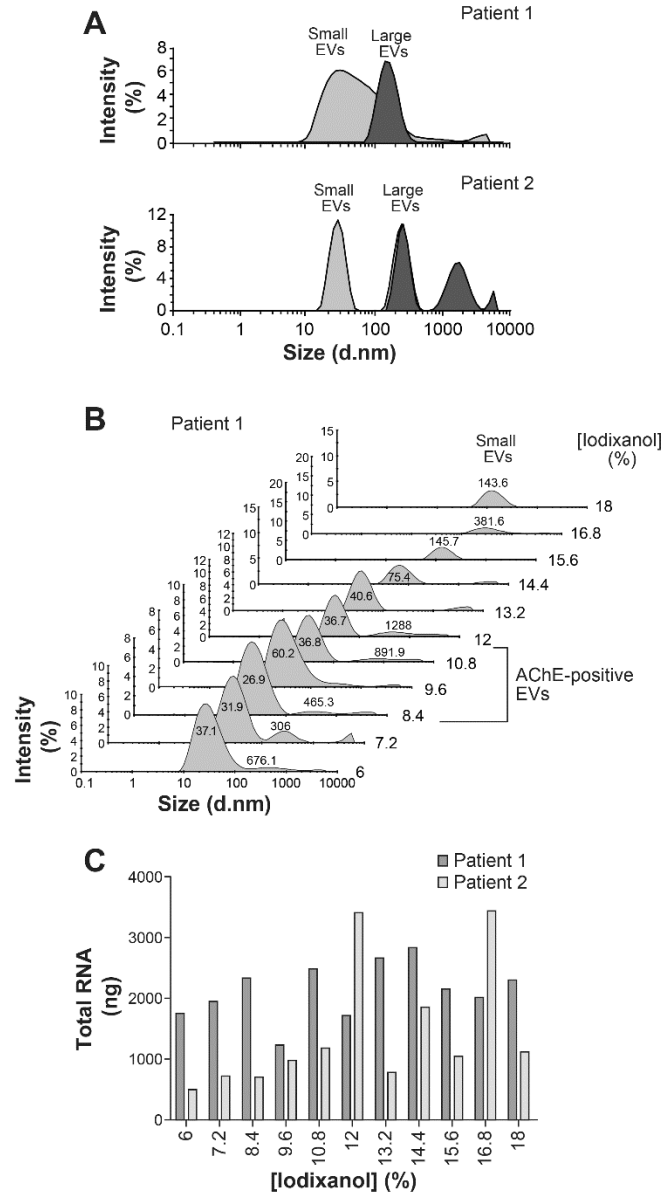

**Figure S5: Size and sedimentation behaviour of plasma EVs obtained from two HIV-1 patients.** Large EVs in plasma were obtained after 17, 000 x g centrifugation, then small EVs in the supernatant were precipitated by using ExoQuick™ according to the manufacturer's instructions. The size (A) of each population of EVs was measured by DLS analysis. ExoQuick™ precipitation of small EVs was overlaid on iodixanol velocity gradient and size (B) or total RNA (C) of small EVs in each gradient fraction was measured by DLS and Biodrop respectively.

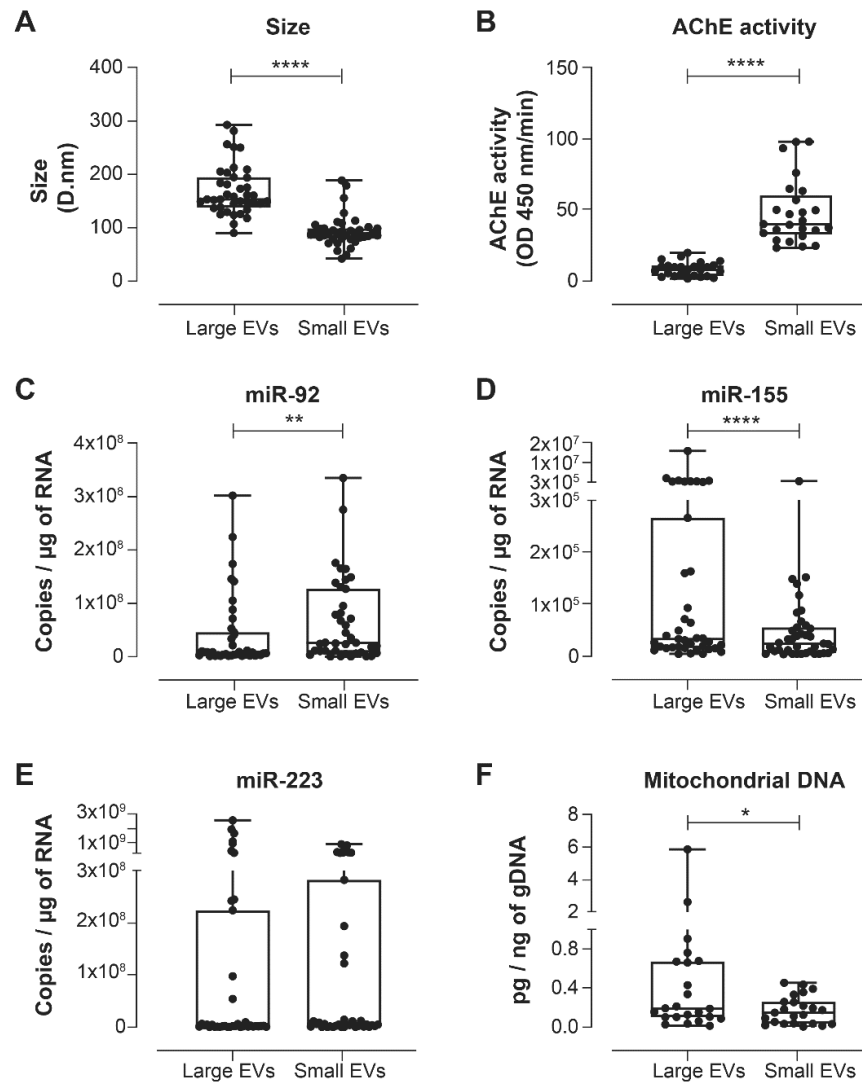

### Figure S6: Large EVs are enriched in miR-155 and mitochondrial DNA

Large and small EVs were recovered from platelet-free plasma of HIV-negative subjects after ultracentrifugation at 17, 000 x g and ExoQuick™ precipitation as described in Material and Methods. EVs sizing by DLS using the Nanosizer (n = 39) (A); AChE EVs activity (n = 26) (B), mature microRNA in total extracted RNA (n = 39) miR-92 (C), miR-155 (D) and miR-223 (E), and mitochondrial DNA level (n = 23) (F) were measured by Nanosizer (DLS), enzymatic activity or by RT-qPCR. P values for statistically significant differences are based on the Wilcoxon matched pairs signed rank test (\* ≤ 0.05, \*\* ≤ 0.01, \*\*\*\* ≤ 0.0001).
